# Supplementary material
Source: HighWire-hosted journal article supplement (https://drc.bmj.com/content/5/1/e000369)
Supplement: inline-supplementary-material-2 [file inline-supplementary-material-2.xlsx]

## Sheet: BMI code list
	Readcodes used
	22K..
	22K0.
	22K1.
	22K2.
	22K3.
	22K4.
	22K5.
	22K6.
	22K7.
	22K8.
	22K9.
	Text searches
	BMI
	Body Mass index
	Weight
	Height

## Sheet: Smoking code list
		Non-smoker
		1371
		1378
		1379
		137A
		137A.
		Current
		1372
		1373
		1374
		1375
		1376
		137C
		137C.
		137D
		137D.
		137E
		137E.
		137G
		137G.
		137H
		137H.
		137I
		137I.
		137J
		137J.
		137L
		137M
		137M.
		137P
		137P.
		137Q
		137Q.
		137R
		137R.
		137V
		137V.
		137X
		137X.
		137Y
		137Y.
		137Z
		137Z.
		137a.
		137b.
		137c.
		137d.
		137e.
		137f.
		137g.
		137h.
		137m.
		Ex-smoker
		1377
		1378
		1379
		137A
		137A.
		137B
		137B.
		137F
		137F.
		137K
		137K.
		137K0
		137N
		137N.
		137O
		137O.
		137O0
		137S
		137S.
		137T
		137T.
		137j.
		137j0
		137l
		137..
		Chewing taboacco
		137W
		137W.

## Sheet: Diabetes codes
			rubric	readcode
			Diabetes mellitus	C10..
			DIABETES	C10..
			Diabetes Type 2 - blood glucose management	C10..
			Diabetes mellitus -adult onset	C10..
			Diabetes mellitus.	C10..
			Diabetes mellitus	C10..00
			Diabetes mellitus with no mention of complication	C100.
			Insulin dependent diab mellit.	C1000
			Insulin dependent diabetes mellitus	C1000
			Diab.mell.no comp. - juvenile	C100000
			Insulin dependent diabetes mellitus	C100000
			Insulin dependent diab mellit.	C100000
			Insulin dependent diabetes mellitus	C100011
			DIABETES MELLITUS INSULIN DEPENDANT	C100011
			Insulin dependent diab mellit.	C100011
			Non-insulin depend.diabet.mell	C1001
			Maturity onset diabetes	C1001
			Non-insulin dependent diabetes mellitus	C1001-2
			Non-insulin depend.diabet.mell	C100100
			Diab.mell.no comp. - adult	C100100
			Non-insulin dependent diabetes mellitus	C100100
			Diabetes mellitus adult onset no mention of complication	C100100
			DIABETES ORAL HYPOGLYCAEMICS	C100100
			HYPOGLYCAEMICS ORAL DIABETES	C100100
			MATURITY ONSET DIABETES MELLITUS	C100100
			Maturity onset diabetes	C100111
			DIABETES (MELLITUS)) MATURITY ONSET	C100111
			DIABETES MATURITY ONSET	C100111
			MATURITY ONSET DIABETES (MELLITUS)	C100111
			DIABETES MELLITUS MATURITY ONSET	C100111
			NIDDM (NON-INSULIN DEPENDENT DIABETES)	C100112
			Non-insulin dependent diabetes mellitus	C100112
			Non-insulin depend.diabet.mell	C100112
			DIABETIC KETOACIDOSIS	C101.
			Diabetes mellitus with ketoacidosis	C101.
			KETOACIDOSIS DIABETIC	C101.
			DIABETIC ACETONAEMIA	C101.
			Diab.mell.with ketoacidosis	C101.
			Diabetes mellitus with ketoacidosis	C101.00
			Diabetes mellitus juvenile type with ketoacidosis	C1010
			Diab.mell.+ketoacid - adult	C101100
			Other specified diabetes mellitus with ketoacidosis	C101y00
			Diabetes mellitus NOS with ketoacidosis	C101z
			Diabetes mellitus with hyperosmolar coma	C102.00
			Diabetes mellitus, adult onset, with hyperosmolar coma	C102100
			Diabetes mellitus adult onset with hyperosmolar coma	C102100
			Diabetes mellitus with ketoacidotic coma	C103.
			Coma - diabetic	C103.
			Nephropathy - diabetic	C104
			Diabetic nephropathy	C104-1
			Nephropathy - diabetic	C104.
			Diabetic nephropathy	C104.
			DIABETIC NEPHROPATHY	C104.
			MSG:Diabetic nephropathy	C104.
			Nephropathy - diabetic	C104.00
			DIABETIC NEPHROPATHY	C104.11
			Diabetes mellitus adult onset with renal manifestation	C1041
			Diabetes mellitus with nephropathy NOS	C104z
			DIABETES MELLITIS	C104z00
			Diab.mell.+ eye manifestation	C105
			Retinopathy - diabetic right	C105.
			Retinopathy - diabetic	C105.
			Diabetes mellitus with ophthalmic manifestation	C105.
			Cataract - diabetic	C105.
			Retinopathy - diabetic (R)	C105.
			Retinopathy - diabetic left and right	C105.
			Retinopathy - diabetic	C105.00
			Neuropathy - diabetic	C106
			Diabetes mellitus with neuropathy	C106.
			Diab.mell. with neuropathy	C106.
			Neuropathy - peripheral	C106.
			Diabetic amyotrophy	C106.
			Diabetes mellitus with neurological manifestation	C106.
			Probable diabetic autonomic neuropathy	C106.
			Diab.mell. with polyneuropathy	C106.
			Neuropathy - diabetic probable	C106.00
			Diabetes mellitus with neuropathy	C106.12
			Diabetes mellitus adult onset + neurological manifestation	C1061
			Diabetes mellitus	C106100
			Diab.mell.+neuropathy - adult	C106100
			Diabetes mellitus NOS with neurological manifestation	C106z
			Diab.mell.+periph.circul.dis	C107
			Diab.mell.+periph.circul.dis	C107.
			Diabetes mellitus with gangrene	C107.
			Diabetes mellitus with peripheral circulatory disorder	C107.
			Diabetes + periph.circulat.dis	C107.
			Diab.mell.+periph.circul.dis	C107.00
			Diabetes with gangrene	C107.12
			Diabetic gangrene - adult	C107200
			NIDDM with peripheral circulatory disorder	C107400
			Insulin dependent diabetes mellitus	C108
			Type 1 diabetes mellitus	C108-2
			MSG:Insulin dependent diabetes mellitus	C108.
			IDDM-Insulin dependent diabetes mellitus	C108.
			Insulin dependent diabetes mellitus	C108.
			Insulin dependent diab mellit.	C108.
			Insulin depnd diabetes melitus	C108.
			Type 1 diabetes mellitus	C108.
			DIABETES MELLITUS : Insulin dependent diabetes	C108.
			Insulin dependent diabetes mellitus	C108.00
			IDDM-Insulin dependent diabetes mellitus	C108.11
			Type 1 diabetes mellitus	C108.12
			Insuln-dep diab mel+renal comp	C1080
			Insulin-dependent diabetes mellitus with ophthalmic comps	C1081
			Insulin-dependent diabetes mellitus with ophthalmic comps	C108100
			Insul-dep diab mel+neuro comps	C1082
			Insul-dep diab mel+neuro comps	C108200
			Type I diab mell + retinopathy	C1087
			Insulin dependent diabetes mellitus with retinopathy	C108700
			Type I diabetes mellitus with retinopathy	C108711
			Insulin dependant diabetes mellitus - poor control	C108800
			Insulin dependent diabetes mellitus - poor control	C108800
			Insulin dependant diabetes maturity onset	C108900
			DIABETES MATURITY ONSET INSULIN DEPENDAN	C108900
			Type I diabetes mellitus with mononeuropathy	C108B11
			Insulin dependent diabetes mellitus with hypoglycaemic coma	C108E00
			Insulin dependent diabetes mellitus with diabetic cataract	C108F00
			Non-insulin dependent diabetes mellitus	C109
			NIDDM - Non-insulin dependent diabetes mellitus	C109-1
			Type 2 diabetes mellitus	C109-2
			Non-insulin dependent diabetes mellitus	C109.
			Non-insulin depd diabetes mell	C109.
			Non-insulin-dependent diabetes mellitus	C109.
			Type 2 diabetes mellitus	C109.
			NIDDM - Non-insu dep diab mel	C109.
			Type II diabetes mellitus	C109.
			NIDDM - Non-insulin dependent diabetes mellitus	C109.
			Non-ins-dep diabetes mellitus	C109.
			Non-insulin depd diabetes mell	C109.00
			NIDDM - Non-insulin dependent diabetes mellitus	C109.11
			Type 2 diabetes mellitus	C109.12
			Type II diabetes mellitus	C109.13
			Non-ins-dp diab mel+renal comp	C1090
			Type 2 diabetes mellitus with renal complications	C1090-2
			Non-insulin-dependent diabetes mellitus with ophthalm comps	C1091
			Non-ins-dp diab mel+neuro comp	C1092
			Non-insulin-dependent diabetes mellitus with neuro comps	C109200
			Non-ins-dp diab mel+multi comp	C1093
			Non-insulin dep diab mell+gang	C109500
			Type II diab mell retinopathy	C1096
			Non-insulin-dependent diabetes mellitus with retinopathy	C109600
			Type II diabetes mellitus with retinopathy	C109611
			Type 2 diabetes mellitus with retinopathy left	C109612
			Type II diabetes mellitus - poor control	C1097
			Non-insulin dependent diabetes mellitus - poor control	C1097
			Non-insulin dependent diabetes mellitus - poor control	C109700
			Poor diabetes control and macroproteinurie	C109700
			Non-insulin dependant diabetes mellitus - poor control	C109700
			Type II diabetes mellitus - poor control	C109711
			Type 2 diabetes mellitus - poor control	C109712
			Non-insulin-dependent diabetes mellitus without complication	C1099
			Non-insulin-dependent diabetes mellitus without complication	C109900
			Type II diabetes mellitus with mononeuropathy	C109A
			Non-insulin dependent diabetes mellitus with nephropathy	C109C
			Non-insulin depend diabetes mellitus with diabetic cataract	C109E
			Type 2 diabetes mellitus with diabetic cataract	C109E-2
			Type II diabetes mellitus with diabetic cataract	C109E11
			Type II diabetes mellitus with neuropathic arthropathy	C109H11
			Insulin treated Type 2 diabetes mellitus	C109J00
			Insulin treated non-insulin dependent diabetes mellitus	C109J11
			Insulin treated Type II diabetes mellitus	C109J12
			Malnutrition-related diabetes mellitus with ketoacidosis	C10A100
			Diabetes mellitus induced by steroids	C10B.
			Diabetes mellitus induced by steroids	C10B.00
			Steroid induced diabetes mellitus without complication	C10B0
			Sterod ind diab mel w/out comp	C10B000
			Maturity onset diabetes in youth	C10C.
			Matur ons diab in youth	C10C.
			Diabetes mellitus autosomal dominant type 2	C10D.
			Matur ons diab youth type 2	C10D.
			Diabetes mellitus autosomal dominant type 2	C10D.00
			Type 1 diabetes mellitus	C10E
			Type 1 diabetes	C10E.
			Insulin dep diabetes mellitus	C10E.
			Type 1 diabetes mellitus	C10E.
			Diabetes mellitus type 1	C10E.
			Type I diabetes mellitus	C10E.
			type 1 diabetes	C10E.
			Type 1 diabetes mellitus	C10E.00
			Type I diabetes mellitus	C10E.11
			Insulin dependent diabetes mellitus	C10E.12
			Insul-dep diab mel+ophth comps	C10E1
			Insul-dep diab mel+ophth comps	C10E112
			Unstable type 1 diabetes mellitus	C10E400
			Unstable type I diabetes mellitus	C10E411
			Type 1 diabetes mellitus with ulcer	C10E500
			Type 1 diabetes mellitus with retinopathy	C10E700
			Type 1 diabetes mellitus - poor control	C10E800
			Insulin dep diabet adult onset	C10E9
			Type 1 diabetes mellitus maturity onset	C10E900
			Insulin-depen dm without comp	C10EA00
			Type 1 diabetes mellitus with mononeuropathy	C10EB00
			Type 1 diabetes mellitus with polyneuropathy	C10EC00
			Insulin dependent diabetes mellitus with polyneuropathy	C10EC12
			IDDM with nephropathy	C10ED
			Type 1 diabetes mellitus with nephropathy	C10ED00
			IDDM with hypoglycaemic coma	C10EE
			Type 1 diabetes mellitus with hypoglycaemic coma	C10EE00
			IDDM with diabetic cataract	C10EF
			Type I diab mell periph angiop	C10EG
			Type 1 diabetes mellitus with neuropathic arthropathy	C10EJ00
			Type 1 diabetes mellitus with persistent proteinuria	C10EK
			Type 1 diabetes mellitus with persistent proteinuria	C10EK00
			Type 1 diabetes mellitus with persistent microalbuminuria	C10EL00
			Type I d m with ketoacidosis	C10EM
			Type 1 diabetes mellitus with ketoacidosis	C10EM
			Type 1 diabetes mellitus with ketoacidosis	C10EM00
			Type 1 diabetes mellitus with ketoacidotic coma	C10EN00
			Type 1 diabetes mellitus with exudative maculopathy	C10EP
			Type 1 diabetes mellitus with exudative maculopathy	C10EP00
			Type 1 diabetes mellitus with gastroparesis	C10EQ00
			Type 2 diabetes mellitus	C10F
			Type 2 diabetes	C10F.
			Type 2 diabetes mellitus	C10F.
			Type 2 Diabetes	C10F.
			Diabetes Type 2 - blood glucose management	C10F.
			Type 2 diabetes mellitus	C10F.00
			Type II diabetes mellitus	C10F.11
			Type 2 diabetes mellitus with renal complications	C10F0
			Type 2 diabetes mellitus with renal complications	C10F000
			MSG:Type 2 diabetes mellitus with renal complications	C10F000
			Type 2 diabetes mellitus with ophthalmic complications	C10F1
			Type 2 diabetes mellitus with ophthalmic complications	C10F100
			Type 2 diabetes mellitus with neurological complications	C10F2
			Type 2 diabetes mellitus with multiple complications	C10F3
			Neuropathic ulcer Rt.	C10F400
			Type 2 diabetes mellitus with ulcer	C10F400
			Type II diab mell retinopathy	C10F6
			Type 2 diabetes mellitus with retinopathy	C10F600
			Type II diabetes mellitus with retinopathy	C10F611
			Type 2 diabetes mellitus - poor control	C10F7
			Type 2 diabetes mellitus - poor control	C10F700
			Type II diabetes mellitus - poor control	C10F711
			Reaven's syndrome	C10F8
			Metabolic syndrome X	C10F8
			Reaven's syndrome	C10F800
			Metabolic syndrome X	C10F811
			Type 2 diabetes mellitus without complication	C10F9
			Type 2 diabetes mellitus without complication	C10F900
			Type II diabetes mellitus without complication	C10F911
			Type II diab mell mononeurop	C10FA
			Type 2 diabetes mellitus with mononeuropathy	C10FA00
			Type II diabetes mellitus with mononeuropathy	C10FA11
			Type 2 diabetes mellitus with polyneuropathy	C10FB00
			Type II diabetes mellitus with polyneuropathy	C10FB11
			Type 2 diabetes mellitus with nephropathy	C10FC00
			Diabetes Quality Indicators v12.0.01	C10FC00
			Type II diabetes mellitus with nephropathy	C10FC11
			Type 2 diabetes mellitus with hypoglycaemic coma	C10FD00
			Type 2 diabetes mellitus with diabetic cataract	C10FE00
			diabetic cataract	C10FE00
			Type 2 diabetes mellitus with arthropathy	C10FG00
			Type 2 diabetes mellitus with neuropathic arthropathy	C10FH
			Type 2 diabetes mellitus with neuropathic arthropathy	C10FH00
			Insulin treated Type 2 diabetes mellitus	C10FJ
			Insulin treated Type 2 diabetes mellitus	C10FJ00
			Insulin treated Type II diabetes mellitus	C10FJ11
			Hyperosmolar non-ketotic state in type 2 diabetes mellitus	C10FK
			Hyperosmolar non-ketotic state in type 2 diabetes mellitus	C10FK00
			Type 2 diabetes mellitus with persistent proteinuria	C10FL
			Type II d m + persist protein	C10FL
			Type 2 diabetes mellitus with persistent proteinuria	C10FL00
			Type 2 diabetes mellitus with persistent microalbuminuria	C10FM
			Type 2 d m + persist microalb	C10FM
			Type 2 diabetes mellitus with persistent microalbuminuria	C10FM00
			Type 2 diabetes mellitus with ketoacidosis	C10FN00
			Diabetes Quality Indicators v20.0.00	C10FN00
			Type 2 diabetes mellitus with exudative maculopathy	C10FQ
			Type 2 diabetes mellitus with exudative maculopathy	C10FQ00
			Type 2 diabetes mellitus with exudative maculopathy. Both ey	C10FQ00
			Type 2 diabetes mellitus with gastroparesis	C10FR00
			Secondary pancreatic diabetes mellitus	C10G.
			Type A insulin resistance	C10K.
			Secondary diabetes mellitus	C10N.
			Cystic fibrosis related diabetes mellitus	C10N1
			Diabetes + other complications annual review	C10y
			Diabetes mellitus with other specified manifestation	C10y.
			Diabetes mellitus with unspecified complication	C10z.
			Other specified diabetes mellitus with unspecified comps	C10zy00
			Gestational diabetes mellitus	L1808
			Diabetes mellitus arising in pregnancy	L1808
